# Supplementary material for: CD4 T Follicular Helper Cells Prevent Depletion of Follicular B Cells in Response to Cecal Ligation and Puncture
Source: PubMed Central journal article supplement (PMC7434988; doi:10.3389/fimmu.2020.01946), 2020-08-12
Supplement: Table_1.pdf [file Table_1.pdf]

| Target                                                | Clone     | Catalogue Number | Company        | Fluorophore  | Host Species |
|-------------------------------------------------------|-----------|------------------|----------------|--------------|--------------|
| CD90.2 (Thy1.2)                                       | 53-2.1    | 140318           | Biolegend      | BV605        | Rat          |
| CD44                                                  | IM7       | 61-0441082       | eBioscience    | PE-eFluor610 | Rat          |
| CD4                                                   | RM4-5     | 563727           | BD Horizon     | BV786        | Rat          |
| CD62L                                                 | MEL-14    | 564108           | BD Bioscience  | BV650        | Rat          |
| CD11a                                                 | M17/a     | 740676           | BD Bioscience  | BV711        | Rat          |
| PD-1 (CD279)                                          | 29F.1A12  | 135215           | Biolegend      | PE/Cy7       | Rat          |
| CXCR5                                                 | L138D7    | 145532           | Biolegend      | AF647        | Rat          |
| CD45R/B220                                            | RA3-6B2   | 103224           | Biolegend      | APC/Cy7      | Rat          |
| CD19                                                  | 6D5       | 115541           | Biolegend      | BV650        | Rat          |
| CD19                                                  | 6D5       | 115543           | Biolegend      | BV785        | Rat          |
| CD138                                                 | 281-2     | 142515           | Biolegend      | BV605        | Rat          |
| CD93                                                  | AA4.1     | 136505           | Biolegend      | PE/Cy7       | Rat          |
| IgM                                                   | RMM-1     | 406517           | Biolegend      | BV421        | Rat          |
| IgD                                                   | 11-26c-2a | 405729           | Biolegend      | AF700        | Rat          |
| GL7                                                   | GL7       | 144605           | Biolegend      | AF647        | Rat          |
| CD23                                                  | B3B4      | 101633           | Biolegend      | PE/Dazzle594 | Rat          |
| CD21/35                                               | 7E9       | 123415           | Biolegend      | PerCPCy5.5   | Rat          |
| IL21                                                  | MHALX21   | 12-7213-80       | eBioscience    | PE           | Rat          |
| CD69                                                  | H1.2F3    | 104508           | Biolegend      | PE           | Hamster      |
| NP-PE                                                 |           | N-5070-1         | Biosearch Tech | PE           |              |
| 4-Hydroxy-3-nitrophenylacetic acid                    |           | 219924-1G        | SigmaAldrich   |              |              |
|                                                       |           |                  |                |              |              |
| In Vivo                                               |           |                  |                |              |              |
| Ultra-LEAF Purified anti-Mouse CD3e                   | 145-2C11  | 100359           | Biolegend      |              | Hamster      |
| Ultra-LEAF Purified Armenian Hamster IgG Isotype Ctrl | HTK888    | 400959           | Biolegend      |              | Hamster      |
